# Supplementary material for: Skipping Exon-v6 from CD44v6-Containing Isoforms Influences Chemotherapy Response and Self-Renewal Capacity of Gastric Cancer Cells
Source: Cancers (Basel). 2020 Aug 22;12(9):2378. doi: 10.3390/cancers12092378 (PMC7564355; doi:10.3390/cancers12092378)
Supplement: Supplementary file 1 [file cancers-12-02378-s001.pdf]

# Supplementary Material: Skipping Exon-v6 from CD44v6-Containing Isoforms Influences Chemotherapy Response and Self-Renewal Capacity of Gastric Cancer Cells

Silvana Lobo, Carla Pereira, Carla Oliveira and Gabriela M. Almeida

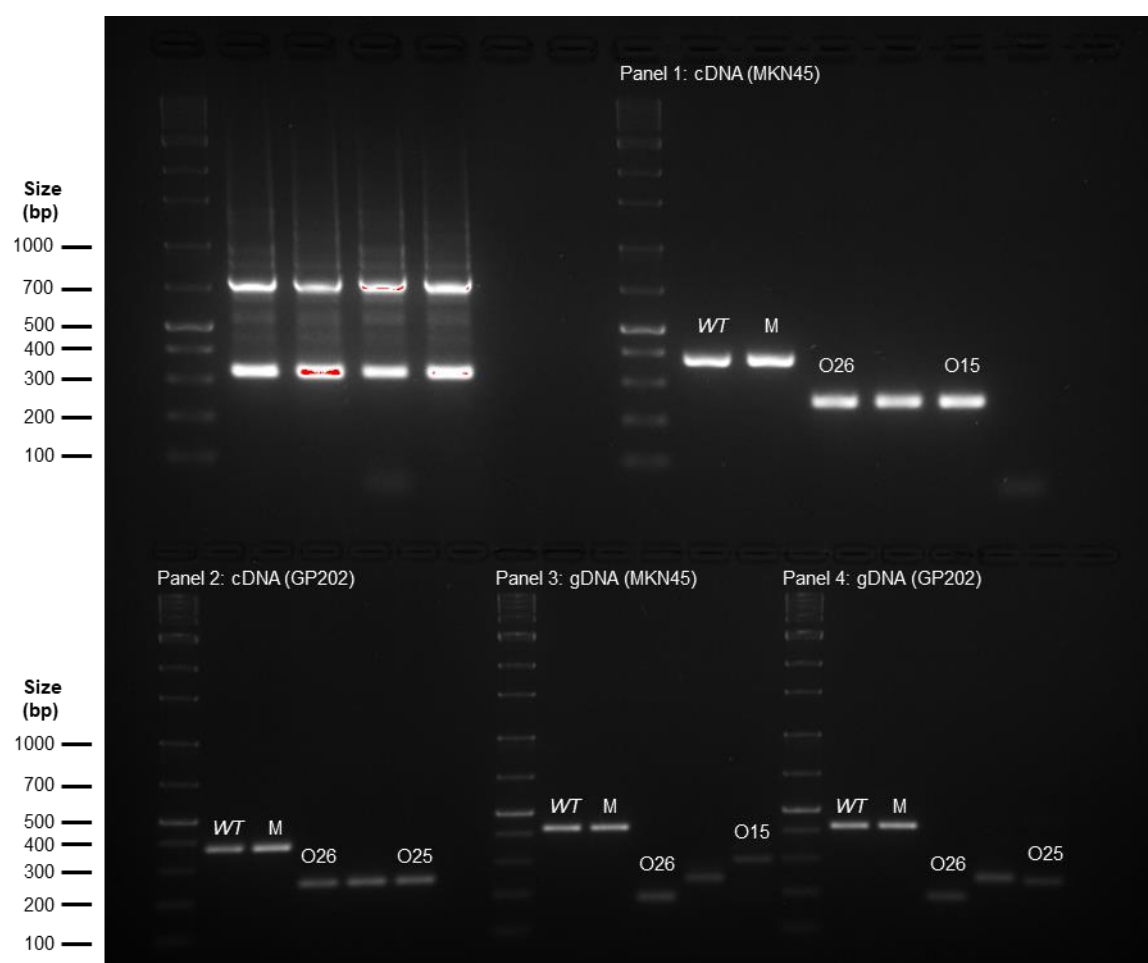

**Figure S1.** Uncropped image of the 2% agarose gel from Figure 2A.

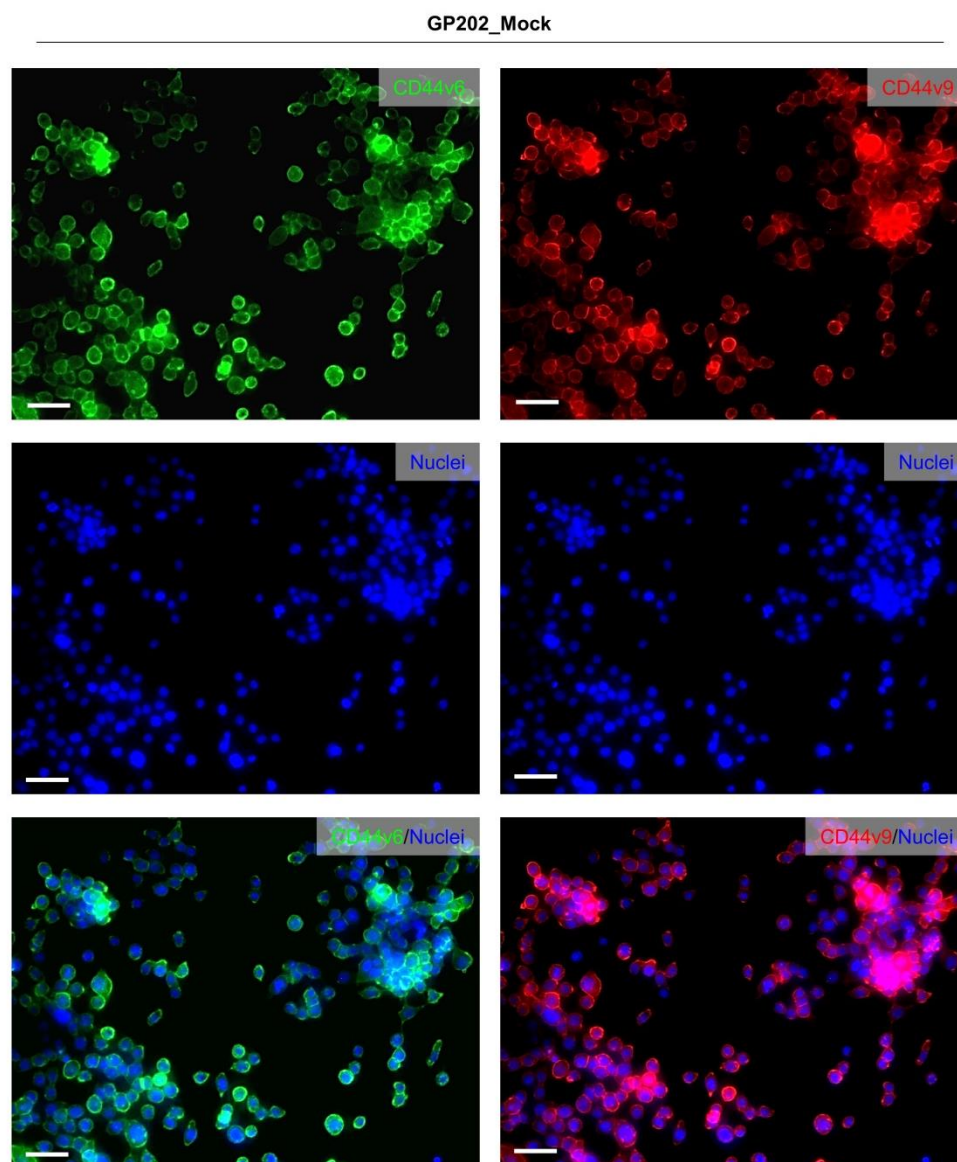

**Figure S2.** Illustrative immunofluorescence images highlighting CD44v6 (green) and CD44v9 (red) membranous staining observed in Figure 3C. Nuclei were stained with DAPI (blue) and white scale bars represent a distance of 50  $\mu$ m.

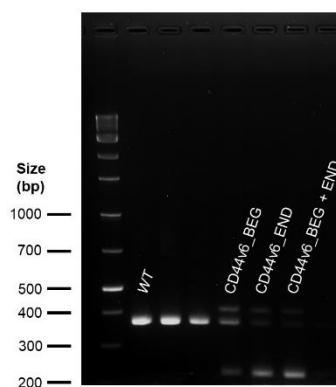

**Figure S3.** Uncropped image of the 2% agarose gel from Figure 6C.

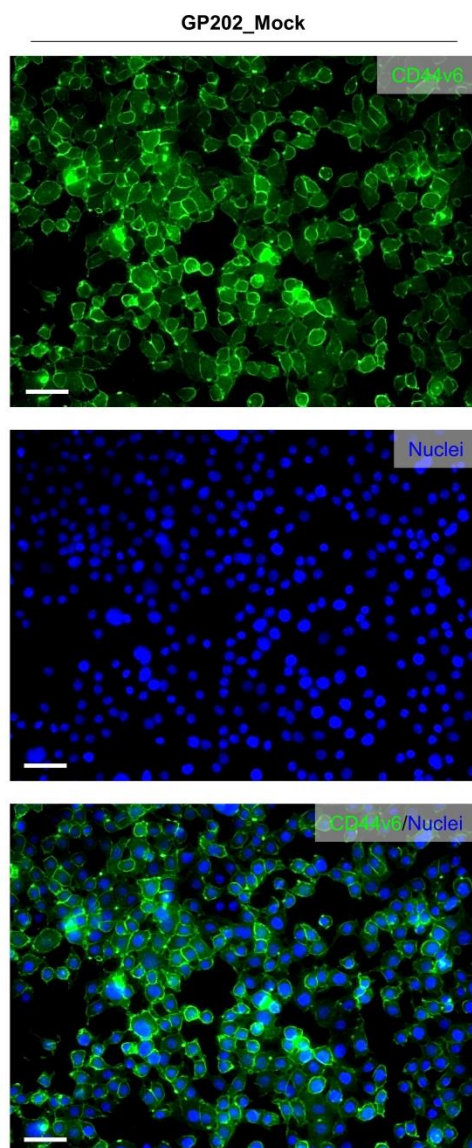

**Figure 4.** Illustrative immunofluorescence images highlighting CD44v6 (green) membranous staining observed in Figure 6E. Nuclei were stained with DAPI (blue) and white scale bars represent a distance of 50  $\mu\text{m}$ .
